# Supplementary material for: Insights into antimicrobial agent sulfacetamide transformation during chlorination disinfection process in aquaculture water
Source: Royal Society of Chemistry journal article supplement (doi:10.1039/d1ra01605a), 2021-01-01
Supplement: d1ra01605a1.pdf [file d1ra01605a1.pdf]

## ***Supporting Information***

***for***

### **Insights into antimicrobial agent sulfacetamide transformation during chlorination disinfection process in aquaculture water**

Yaoguang Guo<sup>a</sup>, Zhiyuan Liu<sup>a, b</sup>, Xiaoyi Lou<sup>\*b</sup>, Changling Fang<sup>b</sup>, Pu Wang<sup>a</sup>, Genying Wu<sup>c</sup>, Jie

Guan<sup>\*a</sup>

<sup>a</sup> *School of Environmental and Materials Engineering, Shanghai Polytechnic University, Shanghai  
201209, China*

<sup>b</sup> *Laboratory of Quality Safety and Processing for Aquatic Product, East China Sea Fisheries  
Research Institute, Chinese Academy of Fishery Sciences, Shanghai 200090, China*

<sup>c</sup> *Longquan Branch of Lishui Municipal Ecological Environment Bureau, Longquan 323700,  
China*

\*Corresponding Authors

E-mail: [huoxingmayi@126.com](mailto:huoxingmayi@126.com) (X. Lou); [guanjie@sspu.edu.cn](mailto:guanjie@sspu.edu.cn) (J. Guan)

1 Table

1 Text

20 Figures

**Table S1 Physical/chemical properties of SFA**

| CAS<br>number | Formula                                                       | Chemical<br>structure                                                             | Molecule<br>weight<br>(g/mol) | Solubility<br>in water<br>(mg/L) | pKa <sub>1</sub> | pKa <sub>2</sub> |
|---------------|---------------------------------------------------------------|-----------------------------------------------------------------------------------|-------------------------------|----------------------------------|------------------|------------------|
|               |                                                               |                                                                                   |                               | <0.01                            |                  |                  |
| 144-80-9      | C <sub>8</sub> H <sub>10</sub> N <sub>2</sub> SO <sub>3</sub> | 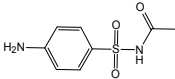 | 214.24200                     | g/100 mL<br>at 16 °C             | 1.76±0.04        | 5.22±0.01        |

**Text S1**

The organic intermediates formed during the SFA degradation were identified with the samples pretreated by liquid-liquid extraction (using CH<sub>2</sub>Cl<sub>2</sub> solvent) to extract and concentrate compounds of different polarity and volatility. Spectra were obtained with a gas chromatography-mass spectrometry (Shimadzu GCMS-QP2010 plus), equipped with DB-5 column (30 m×0.32 mm×0.25 μm), interfaced directly to the mass spectrometer used as a detector. The injections were made in the splitless mode using an injection temperature of 250 °C and the injection volume was 1 uL. Helium was used as carrier gas. The GC column was operated in a temperature programmed mode with an initial temperature of 40 °C held for 5 min, ramp first to 100 °C with a 15 °C/min rate, then to 200 °C with 5 °C/min rate, and then to 270 °C with 20 °C/min rate and held at that temperature for 5 min. Mass spectra were recorded in electron ionization (EI) mode at an ion source temperature of 230 °C and an electron energy of 70 eV. The mass range scanned was 30-400 m/z. The substance analysis was undertaken with reference to the NIST05 mass spectral library database.

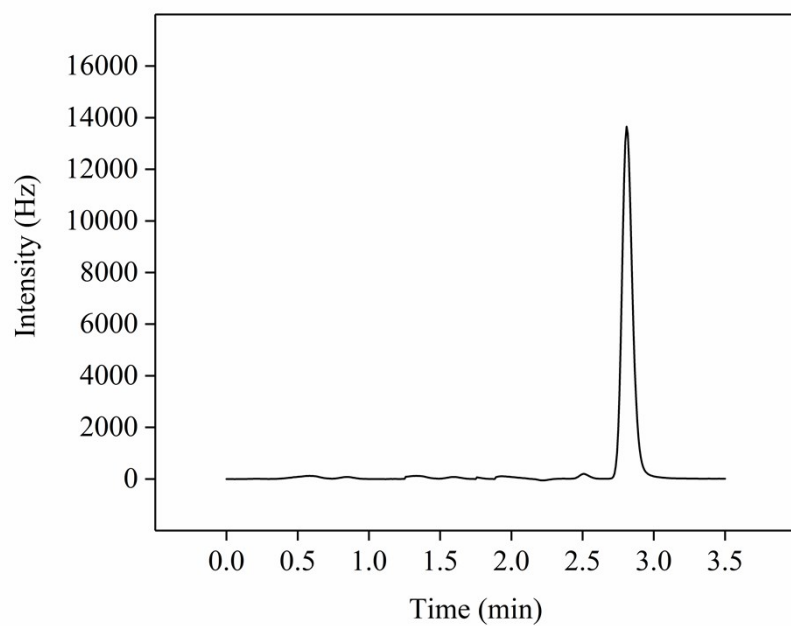

Fig. S1 The HPLC chromatogram map of SFA. Experimental conditions:  $[SFA]_0 = 5 \text{ mg/L}$ ,  $\text{pH}_{\text{ini}} = 5$ .

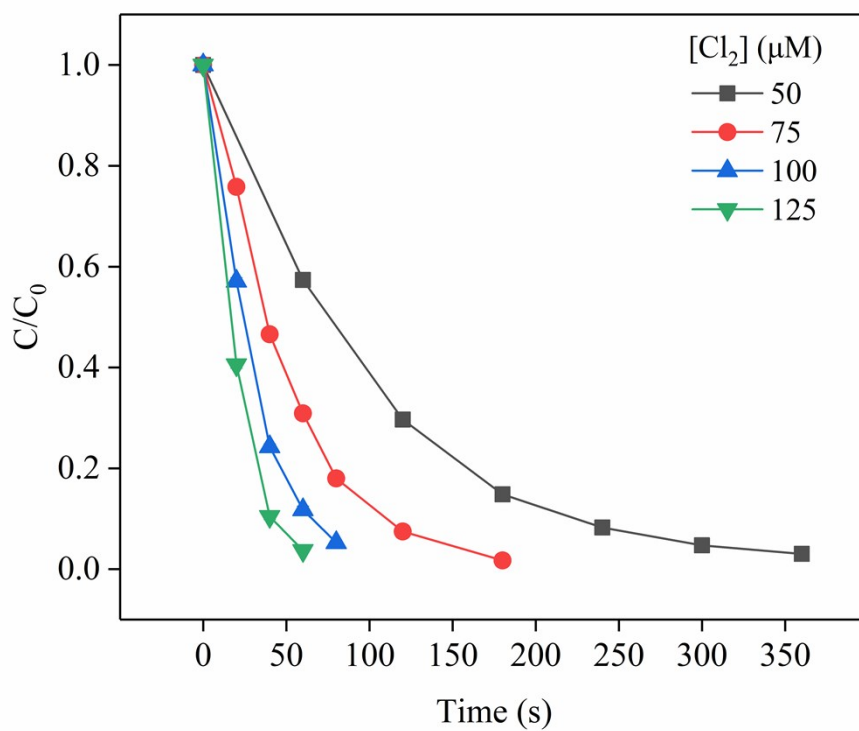

Fig. S2 Effect of  $[Cl_2]$  dose. Experimental conditions:  $[SFA]_0 = 5 \text{ } \mu\text{M}$ ,  $\text{pH}_{\text{ini}} = 5$ ,  $T = 20 \text{ } ^\circ\text{C}$ .

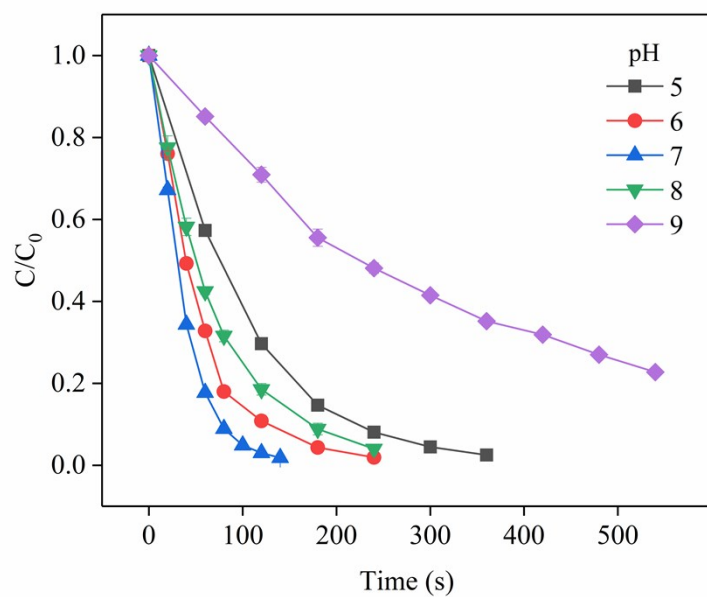

Fig. S3 Oxidation of SFA by  $[\text{Cl}_2]$  at different pH values. Experimental conditions:  $[\text{SFA}]_0 = 5 \mu\text{M}$ ,  $[\text{Cl}_2]_0 = 50 \mu\text{M}$ ,

$T = 20^\circ\text{C}$ .

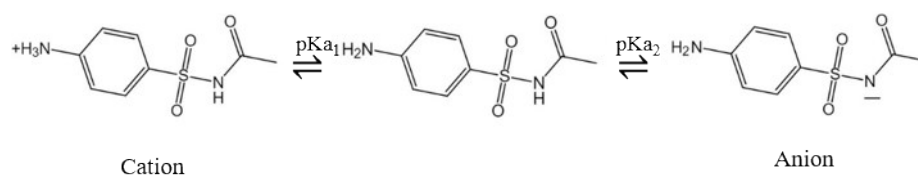

Fig.S4. Speciation patterns of SFA.

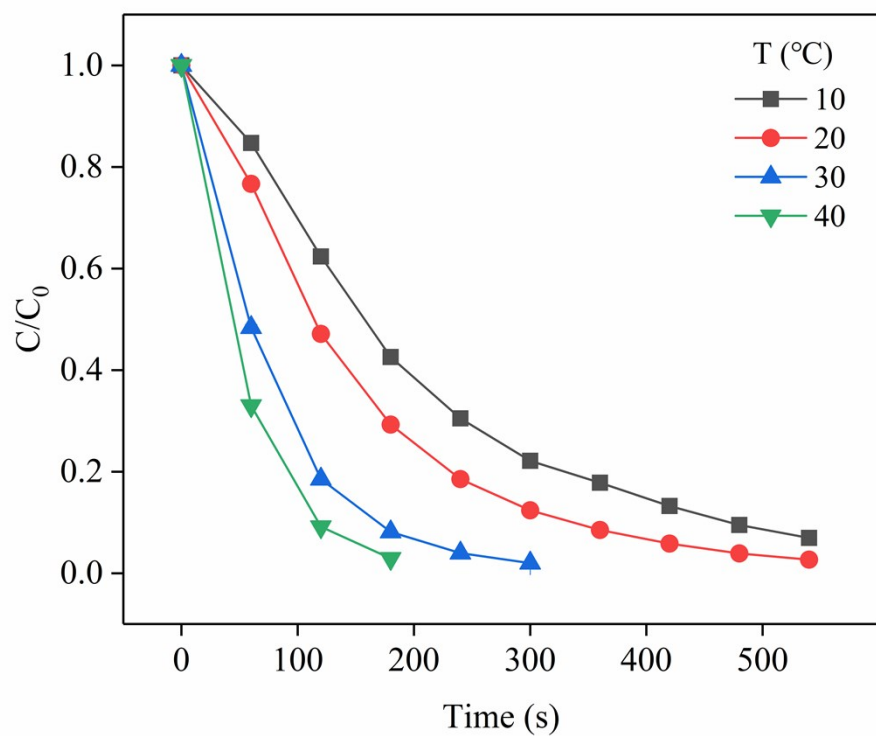

Fig. S5 Effect of water temperature. Experimental conditions:  $[SFA]_0 = 5 \mu M$ ,  $[Cl_2]_0 = 50 \mu M$ ,  $pH_{ini} = 5$ .

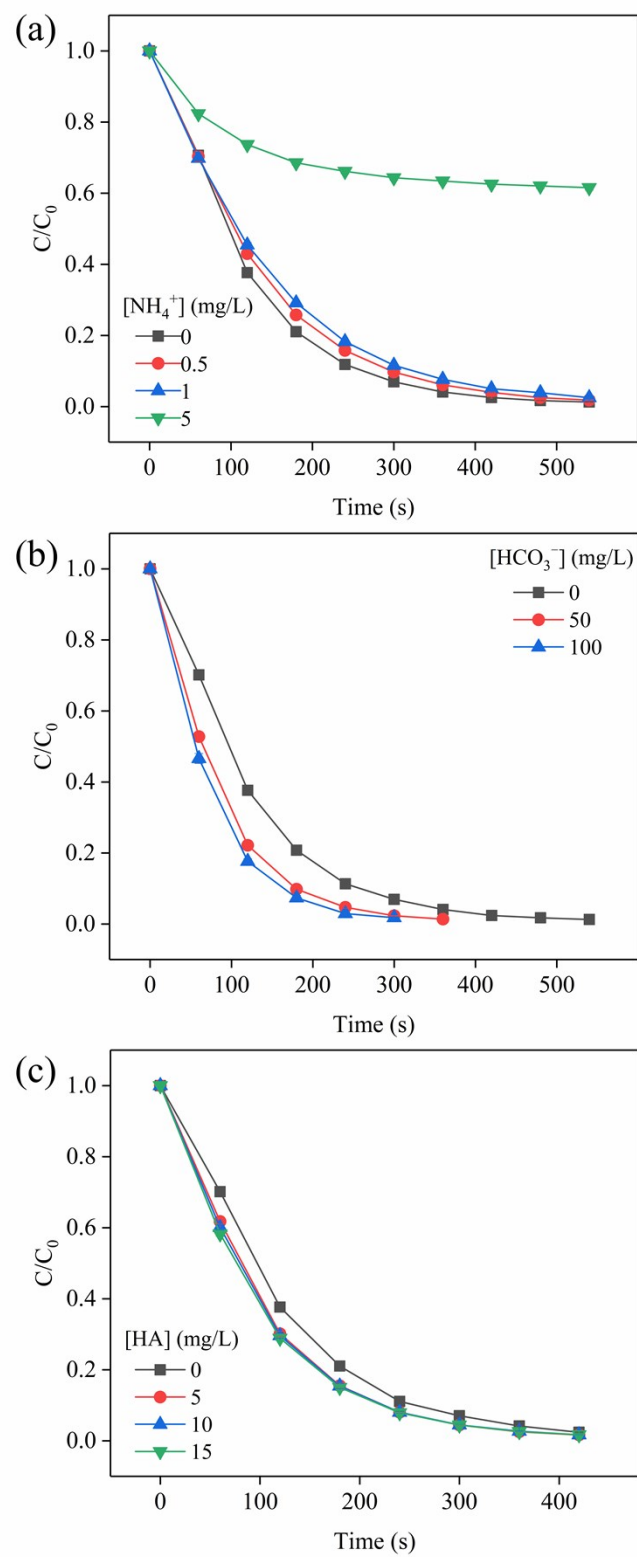

Fig. S6 Effects of concentrations of (a)  $\text{NH}_4^+$ , (b)  $\text{HCO}_3^-$ , and (c) HA on the oxidation of SFA by  $[\text{Cl}_2]$ .

Experimental conditions:  $[\text{SFA}]_0 = 5 \mu\text{M}$ ,  $[\text{Cl}_2]_0 = 50 \mu\text{M}$ ,  $\text{pH}_{\text{ini}} = 5$ ,  $T = 20^\circ\text{C}$ .

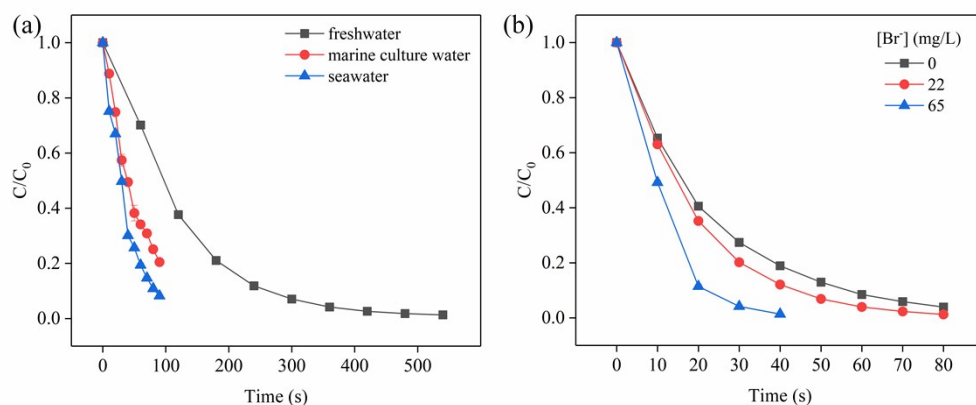

Fig. S7 Effects of (a) different water bodies and (b)  $Br^-$  concentration on SFA degradation. Experimental conditions:  $[SFA]_0 = 5 \mu M$ ,  $[Cl_2]_0 = 50 \mu M$ ,  $pH_{ini} = 5$ ,  $T = 20^\circ C$ .

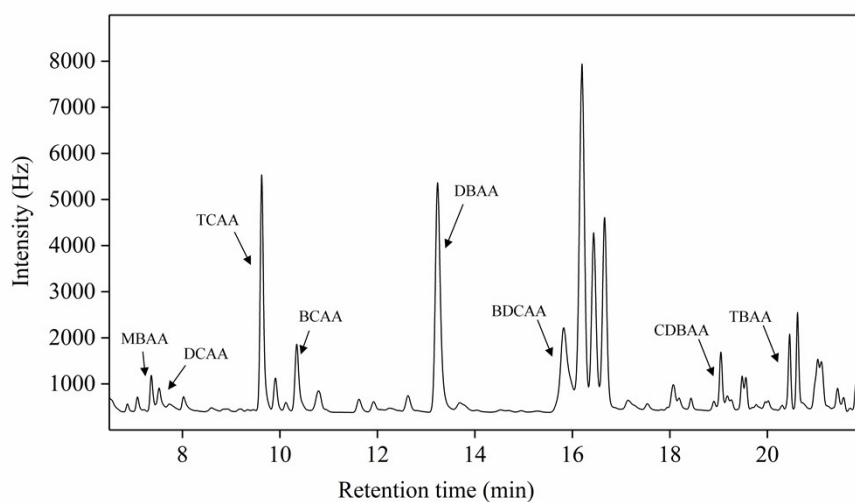

Fig. S8 GC chromatogram of the reaction products after methyl esterification pretreatment in the simulated seawater. Note: Chromatogram of HAAs corresponding to methylated products.

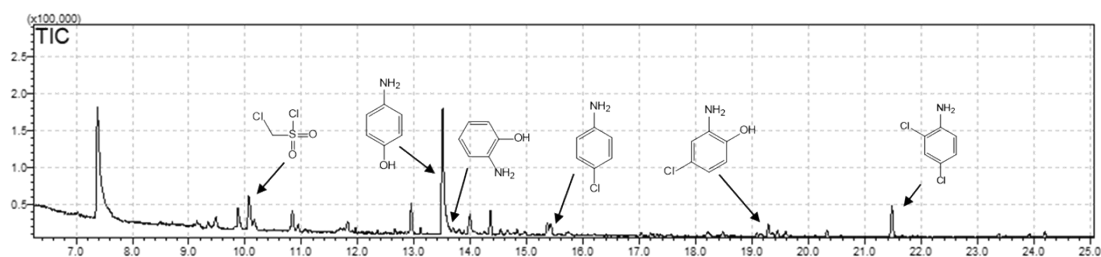

Fig. S9 The total ion chromatogram of the sample after SFA degradation for 2 min in  $NaClO$  system.

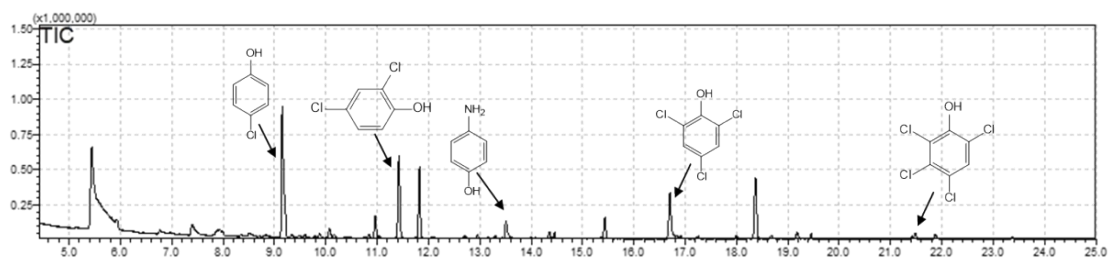

Fig. S10 The total ion chromatogram of the sample after SFA degradation for 90 min in NaClO system.

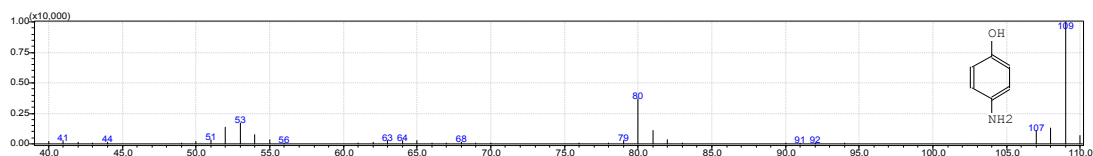

Fig.S11 The GC-MS spectrum of P-aminophenol.

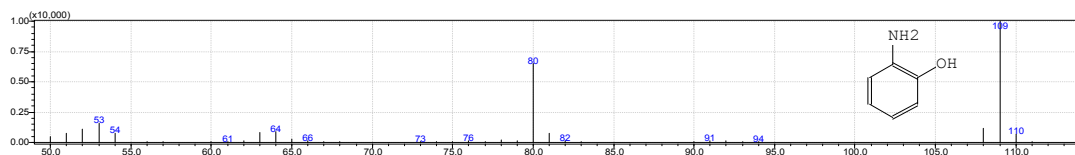

Fig.S12 The GC-MS spectrum of 2-hydroxyaniline.

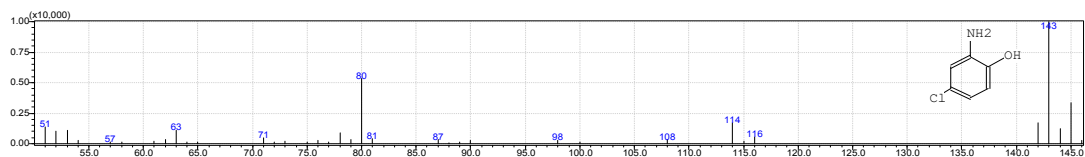

Fig.S13 The GC-MS spectrum of 2-amino-4-chlorophenol.

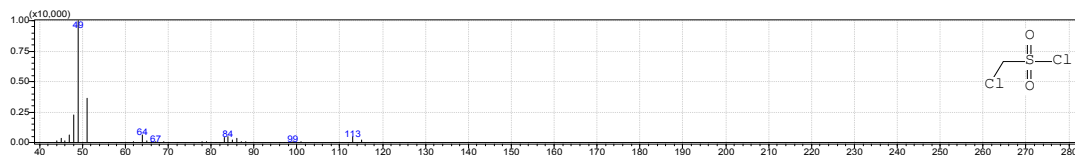

Fig.S14 The GC-MS spectrum of  $\text{CH}_2\text{SO}_2\text{Cl}_2$

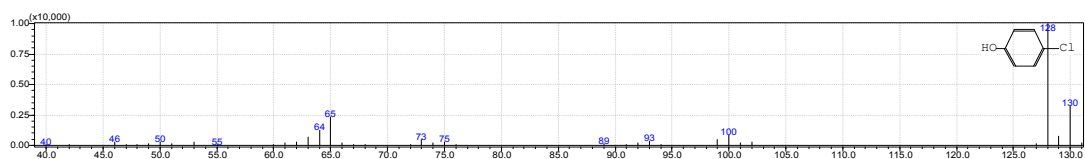

Fig.S15 The GC-MS spectrum of 4-chlorophenol.

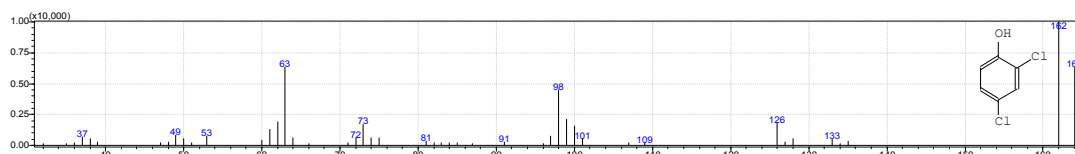

Fig.S16 The GC-MS spectrum of 2,4-dichlorophenol.

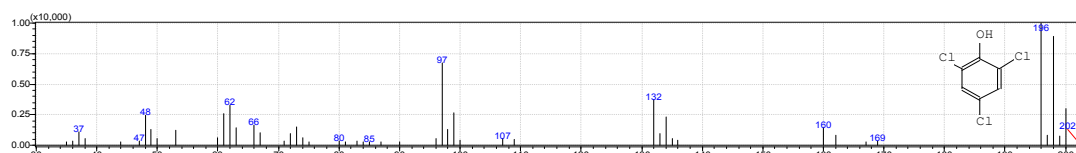

Fig.S17 The GC-MS spectrum of 2,4,6-trichlorophenol.

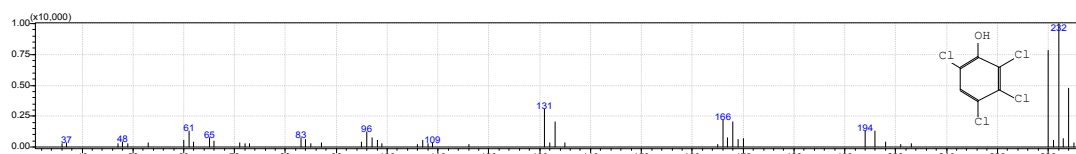

Fig.S18 The GC-MS spectrum of 2,3,4,6-tetrachlorophenol.

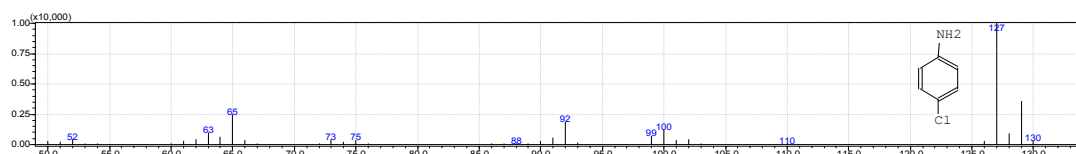

Fig.S19 The GC-MS spectrum of 4-Chloroaniline.

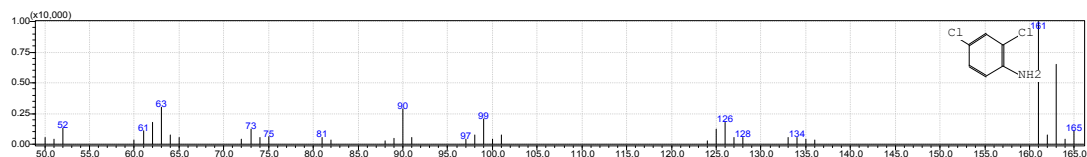

Fig.S20 The GC-MS spectrum of 2,4-dichloroaniline.
